# Supplementary material for: Zanubrutinib for the treatment of relapsed/refractory hairy cell leukemia
Source: PubMed Central journal article supplement — Blood Adv. 2023 Feb 10;7(12):2884–7. doi: 10.1182/bloodadvances.2022008990 (PMC10300288; doi:10.1182/bloodadvances.2022008990), 2023-02-10
Supplement: BLOODA_ADV-2022-008990-mmc1.pdf [file BLOODA_ADV-2022-008990-mmc1.pdf]

**Supplemental Table 1. Treatment-emergent adverse events\* by preferred term**

|                                                  | <b>No. of patients (%)<br/>(N = 12)</b> |
|--------------------------------------------------|-----------------------------------------|
| <b>Patients with ≥1 TEAE</b>                     | 11 (91.7)                               |
| Grade ≥3 TEAE                                    | 7 (58.3)                                |
| Serious TEAE                                     | 2 (16.7)                                |
| TEAE leading to death                            | 0 (0.0)                                 |
| TEAE leading to treatment discontinuation        | 1 (8.3)                                 |
| TEAE leading to dose modification                | 4 (33.3)                                |
| Leading to dose reduction                        | 2 (16.7)                                |
| Leading to dose interruption                     | 4 (33.3)                                |
| <b>Patients with ≥1 TEAE of special interest</b> | 11 (91.7)                               |
| Infections                                       | 8 (66.7)                                |
| Neutropenia                                      | 5 (41.7)                                |
| Hemorrhage                                       | 5 (41.7)                                |
| Thrombocytopenia                                 | 3 (25.0)                                |
| Second primary malignancy                        | 2 (16.7)                                |
| Anemia                                           | 1 (8.3)                                 |
| Hypertension                                     | 1 (8.3)                                 |
| Opportunistic infection                          | 1 (8.3)                                 |

\*A patient could have experienced more than one event. TEAE, treatment-emergent adverse event.
